# Supplementary material for: Biomimetic 3D Models for Investigating the Role of Monocytes and Macrophages in Atherosclerosis
Source: PubMed Central journal article supplement (PMC7552756; doi:10.3390/bioengineering7030113), 2020-09-16
Supplement: bioengineering-07-00113-s001.pdf [file bioengineering-07-00113-s001.pdf]

Supplementary Materials

Table 1. Primer list.

| Gene  | Primer Sequences     |                                              |
|-------|----------------------|----------------------------------------------|
| LOX1  | Forward:<br>Reverse: | ACGGACAGACAGACAGACAG<br>GGCCACACATCCCATGATTC |
| CD36  | Forward:<br>Reverse: | TGGTACAGATGCAGCCTCAT<br>AGGCCTTGGATGGAAGAACA |
| CD68  | Forward:<br>Reverse: | CATGGCGGTGGAGTACAATG<br>GCAGGAGAACTTTGCCCAA  |
| MHCII | Forward:<br>Reverse: | TCCTGGTCCAACTTCTGTCC<br>CCCAACCTCATCCGATCTGA |
| ACTB  | Forward:<br>Reverse: | CATCCGCAAAGACCTGTACG<br>CCTGCTTGCTGATCCACATC |

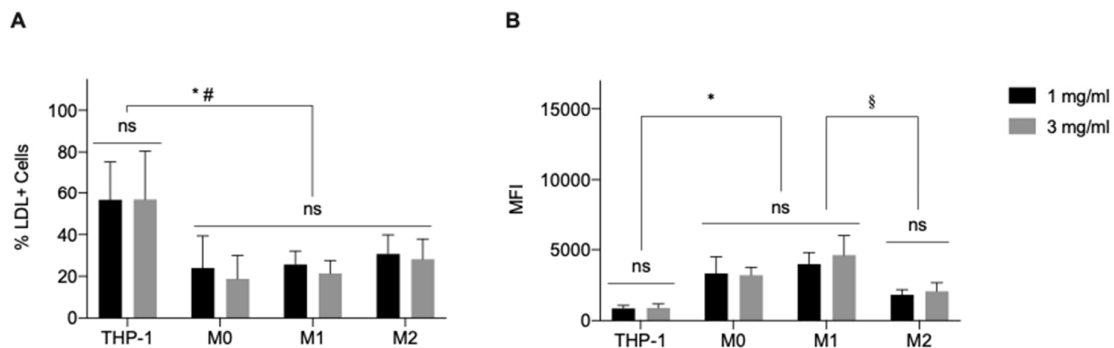

**Figure 1.** Fluorescence assisted cell sorting assessment of LDL uptake by monocytes and macrophages cultured in 3D collagen hydrogels. **(A)** The number of (oxLDL+) cells for THP-1 monocytes and THP-1-derived macrophages. **(B)** The amount of LDL in the cells, as quantified through mean fluorescence intensity (MFI), is also shown. A sample size of  $n = 5$  was performed. Significance is represented as \*  $p < 0.05$  between THP-1 vs. M0 and M1, §  $p < 0.05$  between M1 and M2, and #  $p < 0.1$  between 1 mg/ml and 3 mg/ml THP-1, and M2 at the same matrix conditions.
